# Supplementary material for: Direct electrocatalytic conversion of crude syngas to ethylene via a multi-process coupled device
Source: Royal Society of Chemistry journal article supplement (doi:10.1039/d3ey00005b), 2023-01-01
Supplement: d3ey00005b1.pdf [file d3ey00005b1.pdf]

**Electronic Supplementary Information**

**Directly Electro-Catalyze Crude Syngas to Ethylene via a Multi-  
Process Coupled Device**

Mo Zhang,<sup>ab</sup> Ruixue Chen,<sup>b</sup> Suheng Wang,<sup>b</sup> Yunchuan Tu,<sup>a</sup> Xiaoju Cui,<sup>\*ac</sup> Dehui  
Deng<sup>\*abc</sup>

<sup>a</sup> State Key Laboratory of Catalysis, Collaborative Innovation Center of Chemistry for Energy  
Materials, Dalian Institute of Chemical Physics, Chinese Academy of Science, Dalian 116023,  
China.

<sup>b</sup> State Key Laboratory of Physical Chemistry of Solid Surfaces, Collaborative Innovation Center of  
Chemistry for Energy Materials, College of Chemistry and Chemical Engineering, Xiamen  
University, Xiamen 361005, China.

<sup>c</sup> University of Chinese Academy of Sciences, Beijing 100049, China.

\* Email: cuixiaoju@dicp.ac.cn, dhdeng@dicp.ac.cn

## Experimental Section

### Chemicals

$\text{Co}(\text{NO}_3)_3 \cdot 6\text{H}_2\text{O}$ ,  $\text{Ni}(\text{CH}_3\text{COO})_2 \cdot 4\text{H}_2\text{O}$ , urea, citric acid and ethylene glycol (99.8%) were purchased from Sigma-Aldrich.  $\text{CuSO}_4 \cdot 5\text{H}_2\text{O}$ , L-ascorbic acid, ethanol, NaOH, NaCl and polyvinyl pyrrolidone K-30 (PVP) were purchased from Sinopharm Chemical Reagent Co., Ltd.  $\text{Na}_2\text{S} \cdot 6\text{H}_2\text{O}$  were purchased from Xilong Scientific Co., Ltd. All chemicals were used as received without further purification.

### Preparation of CoNi@NGs and CoNiO<sub>x</sub>-CNTs

The CoNi@NGs were prepared through a template-assisted method.<sup>1</sup> Briefly, Co and Ni precursor were precipitated on the  $\text{SiO}_2$  templet by the hydrothermal method. Then transfer the gotten sample into a CVD furnace, and deposit graphene shells by bubbling  $\text{CH}_3\text{CN}$  as the carbon and nitrogen source at 600 °C. Finally, the samples CoNi@NGs were collected after washed in HF aqueous solution and distilled water. For CoNiO<sub>x</sub>-CNTs preparation, the Co and Ni precursor were firstly precipitated on the carbon nanotubes (CNTs) via the hydrothermal method, and then the sample was treated at 400 °C under Ar for 1 h in the CVD furnace.

### Preparation of Cu catalyst

For synthesis of Cu catalyst,  $\text{CuSO}_4 \cdot 5\text{H}_2\text{O}$ , PVP and NaCl were dissolved by ethylene glycol (EG) in a flask. Then the mixture of NaOH and L-ascorbic acid EG solution was preheated was injected to the flask for 40 minutes in the heating of 100 °C. The Cu catalyst was collected by centrifuge and washed with deionized  $\text{H}_2\text{O}$  and ethanol, respectively. The obtained Cu sample was dispersed into ethanol and used for preparing cathodic electrode for CO electroreduction.<sup>2</sup>

### Characterization

Transmission electron microscope (TEM) was conducted on Tecnai F20

transmission electron microscope operated at an accelerating voltage of 200 kV. Scanning electron microscopy (SEM) measurements were carried out by using Hitachi S-4800 scanning electron microscope with 15 kV accelerating voltage. The Faradic efficiency (FE) of gas phase products was measured on gas chromatography GC 2060 produced by Ruimin Instrument Company in Shanghai. The FE of liquid phase products was analyzed on a Bruker 500-MHz NMR spectrometer. The content of H<sub>2</sub>S was confirmed by Quadrupole Mass Spectrometer EQMS-I (Shanghai Quan Tang Scientific Instruments).

### **Electrochemical measurements**

All the electrochemical measurements were carried out with CHI 760E equipped with a gas flow controlling system at 25 °C. The test was carried in a double-cell electrolytic tank segregated with Nafion 117 membrane. The electrodes were set in the 1 M NaOH electrolyte.

### **Preparation of the anodic electrode**

The anodic electrode was assembled by covering CoNi@NGs catalyst on a Ni foam electrode (1 cm<sup>2</sup> square, 1 mm thickness). Typically, 7 mg CoNi@NGs catalyst was dispersed in 1.95 mL ethanol with 50  $\mu$ L Nafion solution (5 wt%, Du Pont) to form a homogeneous ink. Then 2 mL ink was added dropwise onto the Ni foam and dried under the room temperature. The final loading of CoNi@NGs was 7 mg cm<sup>-2</sup>.

### **Preparation of the cathodic electrode**

The carbon paper (GDS3250) with micro-porous layer (MPL) was bought from *AvCarb Material Solutions*. For preparing electrode loading catalysts, 10 mg catalysts and 50  $\mu$ L Nafion solution were dispersed into 1.5 mL ethanol by ultrasound. Then the ink was dropped on the carbon papers and dried under the room temperature. The final loading of Cu particles was 1 mg cm<sup>-2</sup>.

## The SOR catalytic performance test of CoNi@NGs

For SOR reaction, 1 M Na<sub>2</sub>S was added in the anodic electrolyte. The polarization curve of CoNi@NGs was tested in a standard three-electrode cell. The reference electrode Hg/HgO was calibrated according to the formula  $E_{\text{versus RHE}} = 0.098 + 0.0591 \text{ pH}$ . The pH was tested by the pH value meter at 25 °C. The activities of CoNi@NGs were evaluated with a scan rate of 5 mV/s. The test of galvanostatic method was tested in a standard two-electrode cell. The catalytic performance of direct electrolysis of H<sub>2</sub>S-contained syngas was performed after bubbling the H<sub>2</sub>S-contained syngas to the anodic electrolyte for one hour.

## The CORR catalytic performance of Cu catalyst

The performance of Cu catalyst in the coupled device was measured by the galvanostatic method. The FE of gas phase and liquid phase products was measured by gas chromatography and NMR spectrometer, respectively.

## Gas chromatography and NMR analysis

The amount of H<sub>2</sub> and C<sub>2</sub>H<sub>4</sub> was evaluated by gas chromatography. During the test, reaction gas (CO or syngas) was purged continuously through the mass flow meter and directly routed into gas chromatography every 10 min. Quantification of the H<sub>2</sub> and C<sub>2</sub>H<sub>4</sub> were performed using the thermal conductivity detector (TCD) and flame ionization detector (FID), respectively. The quantity and retention time of the gas were calibrated with a series of standard gas samples. The FEs of cathodic gas products were calculated by the following equation:

$$R_{\text{product}} = \frac{A_{\text{test}}}{A_{\text{standard}}} \times c_{\text{standard}} \times R_{\text{reaction gas}}$$

$$i_{\text{product}} = R_{\text{product}} \times \frac{2Fp_0}{RT}$$

$$FE_{\text{product}} = \frac{i_{\text{product}}}{i_{\text{total}}} \times 100\%$$

$R_{\text{product}}$  : flow rate of H<sub>2</sub> or C<sub>2</sub>H<sub>4</sub>

$A_{\text{test}}$  : peak area of the gas generated at the specific time point

$A_{standard}$  : peak area of the gas in the standard gas samples  
 $c_{standard}$  : volume concentration of test gas in the standard gas samples  
 $R_{reaction\ gas}$  : flow rate of reaction gas  
 $i_{product}$  : geometric current density of H<sub>2</sub> or C<sub>2</sub>H<sub>4</sub>  
 $F$  : Faradic constant, 96485 C mol<sup>-1</sup>  
 $p_0$  : pressure  
 $R$  : ideal gas constant, 8.314 J mol<sup>-1</sup> K<sup>-1</sup>  
 $T$  : temperature, 298 K  
 $FE_{product}$  : Faradic efficiency of H<sub>2</sub> or C<sub>2</sub>H<sub>4</sub>  
 $i_{total}$  : total current density in the reaction

The liquid products were analyzed on a Bruke 500-MHz NMR spectrometer. The 0.5 mL sample of the electrolyte was mixed with 0.05 mL D<sub>2</sub>O and 0.05 mL 2.38 mM dimethyl sulphoxide (DMSO, used as internal standard). The one-dimensional <sup>1</sup>H spectrum was measured with water suppression method. The amount of products were calculated according to standard curves, which were tested by a series of standard gas samples.

There are four carbon-based products in the cathode from CORR. The selectivity of C<sub>2</sub>H<sub>4</sub> was were calculated by the following equation:

$$FE_{CORR} = FE_{C_2H_4} + FE_{EtOH} + FE_{AcO^-} + FE_{n-PrO}$$

$$S_{C_2H_4} = \frac{FE_{C_2H_4}}{FE_{CORR}}$$

$FE_{CORR}$  : The cathodic FE of CO reduced reaction

$S_{C_2H_4}$  : The selectivity of C<sub>2</sub>H<sub>4</sub>

### Energy saving efficiency analysis

The value of energy saving efficiency was calculated to verify the low energy consumption of ethylene production in the coupled device versus uncoupled device.

The energy saving efficiency is calculated based on the following equations:

$$E_{device} = U \times I \times t$$

$$E_u \text{ or } E_c = \frac{E_{device} \times F E_{C_2H_4}}{n_{C_2H_4}}$$

$$Energy \text{ Saving efficiency}_{C_2H_4} = \frac{E_u - E_c}{E_u} \times 100\%$$

134  $E_{device}$  : the energy consumption of the device

135  $U$  : the applied potential for the device

136  $I$  : the applied current for the device

137  $t$  : reaction time

138  $E_u \text{ or } E_c$  : the energy consumption of ethylene production in the uncoupled device ( $E_u$ )

139 or coupled device ( $E_c$ )

140  $n_{C_2H_4}$  : the amount of produced  $C_2H_4$

141  $Energy \text{ Saving efficiency}_{C_2H_4}$  : the energy saving efficiency in the multi-process

142 coupled device

143

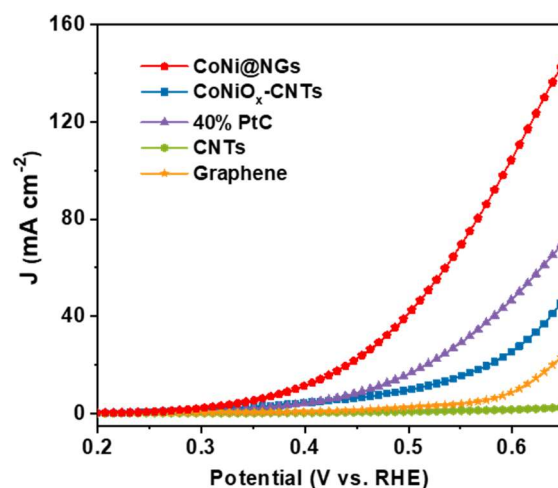

**Fig. S1** The SOR polarization curves for CoNi@NGs in comparison with 40% Pt/C, graphene, carbon nanotubes (CNTs) and the cobalt and nickel oxide nanoparticles supported on carbon nanotubes (CoNiO<sub>x</sub>-CNTs) at the same mass loading. The current density of CoNi@NGs is much higher than the other materials, which indicates that CoNi@NGs possess a higher activity for H<sub>2</sub>S oxidation. The mixture of 1 M NaOH and 1 M Na<sub>2</sub>S serves as the anodic electrolyte and 1 M NaOH serves as the cathodic electrolyte.

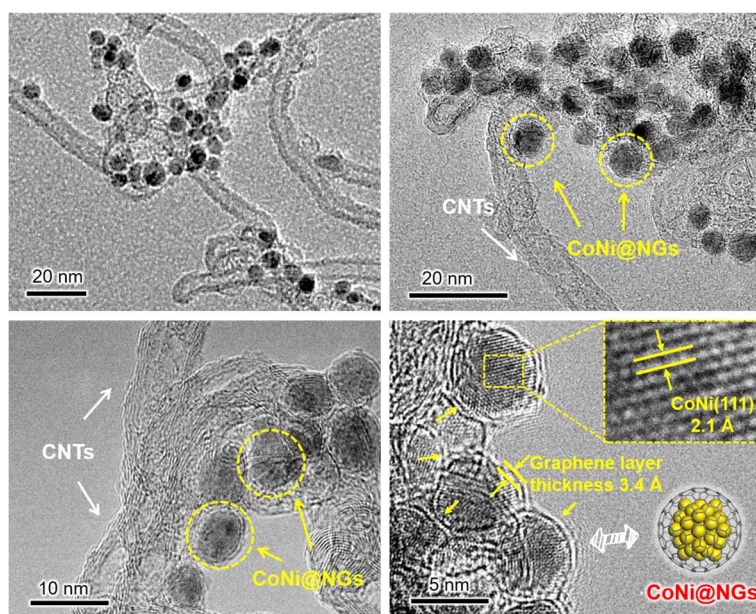

**Fig. S2** The TEM images of CoNi@NGs. It clearly shows that the CoNi alloy nanoparticles are encapsulated by the single layer graphene.

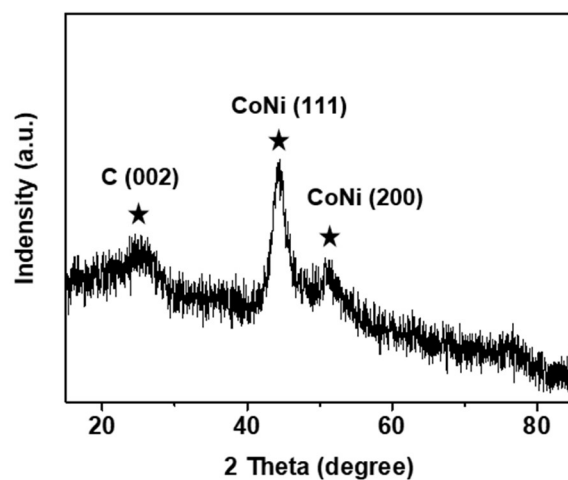

**Fig. S3** The X-ray diffraction (XRD) pattern of CoNi@NGs. The crystal structure of CoNi alloy NPs is confirmed by the XRD test, which exhibits two main diffraction peaks at  $2\theta = 44.44^\circ$ , and  $51.72^\circ$ , corresponding to the (111) and (200) facets of the CoNi alloy.

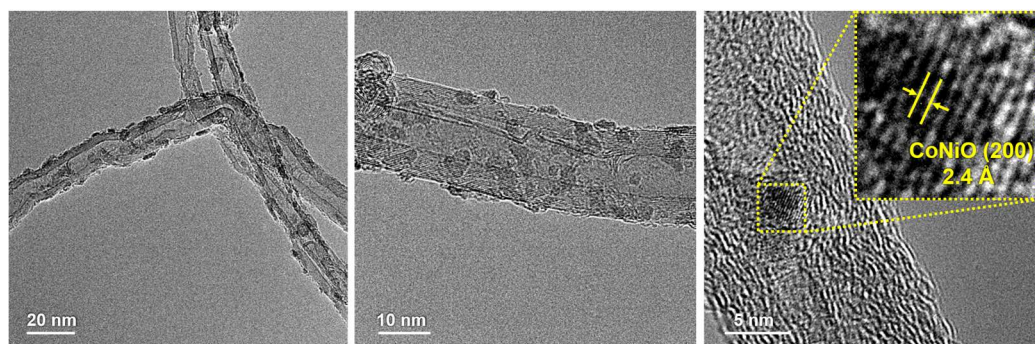

**Fig. S4** The HRTEM images of CoNiO<sub>x</sub>-CNTs. The cobalt and nickel oxide nanoparticles (CoNiO<sub>x</sub>) are supported on the CNTs evidenced by the crystal plane of CoNiO(200).

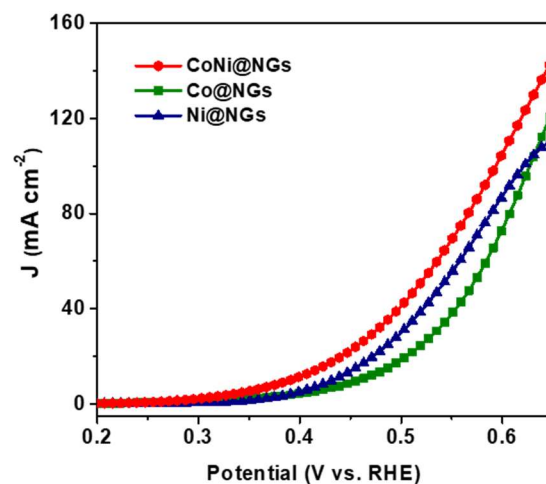

**Fig. S5** The SOR polarization curves for CoNi@NGs in comparison with Co@NGs, Ni@NGs at the same mass loading. The current density of CoNi@NGs is much higher than the Co@NGs and Ni@NGs. The mixture of 1 M NaOH and 1 M Na<sub>2</sub>S serves as the anodic electrolyte and 1 M NaOH serves as the cathodic electrolyte.

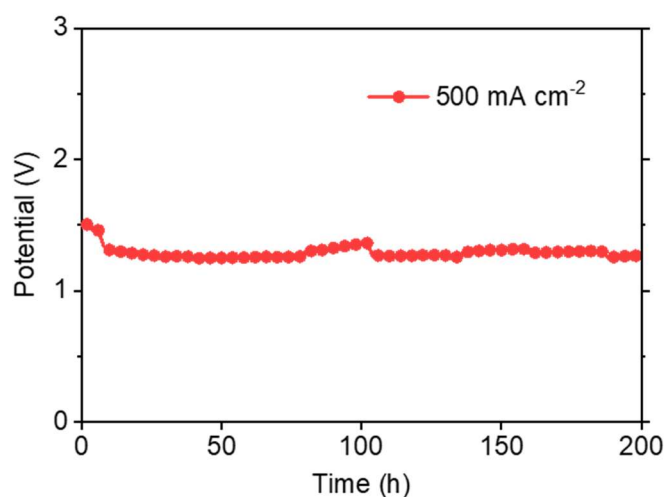

**Fig. S6** Galvanostatic test for the CoNi@NGs in the SOR at the current density of 500 mA cm<sup>-2</sup> for 200 hours.

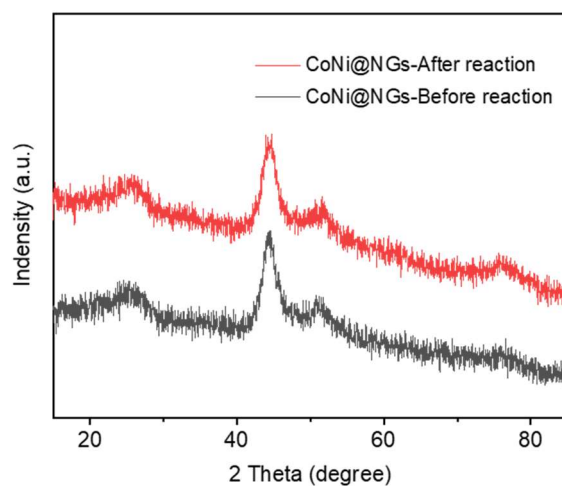

**Fig. S7** The X-ray diffraction (XRD) pattern of CoNi@NGs before and after 200 hours' durability test.

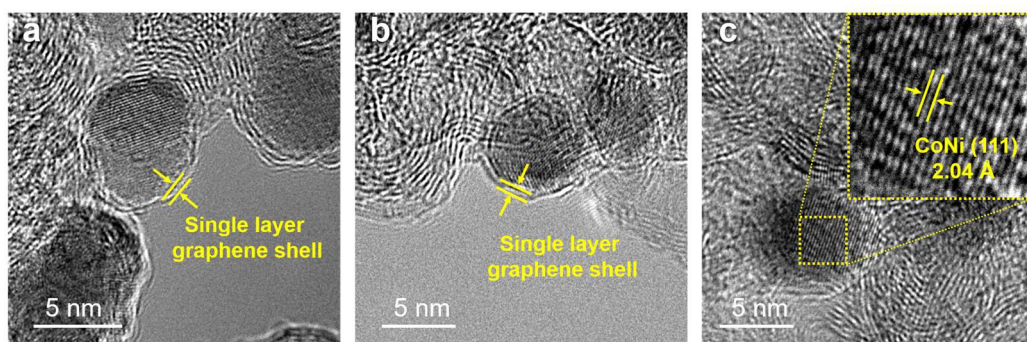

**Fig. S8** The HRTEM images of CoNi@NGs after 200 hours' durability test.

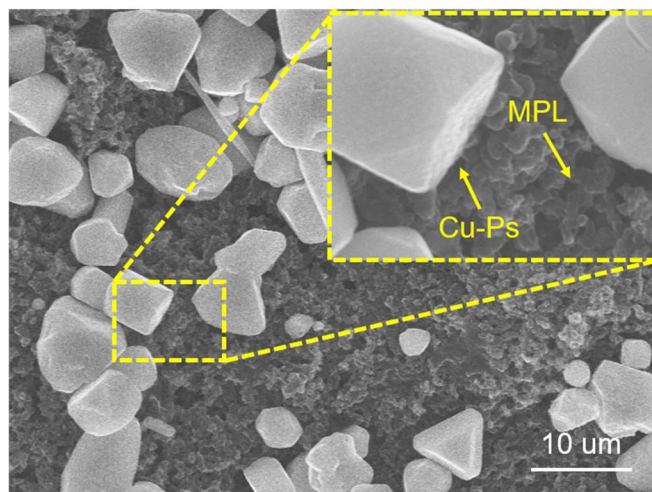

**Fig. S9** The SEM image of Cu catalyst electrode. The Cu particles were loaded on the carbon paper with micro-porous layer.

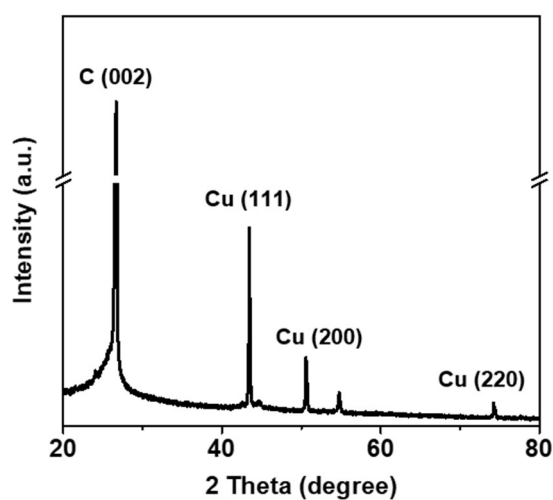

**Fig. S10** The XRD pattern of Cu catalyst. The crystal structure of Cu presents three main diffraction peaks, corresponding to the (111), (200) and (220) facets of the Cu foil.

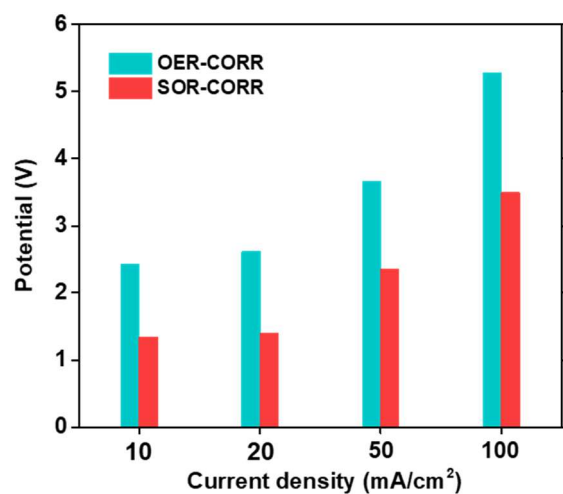

**Fig. S11** Comparison of the potentials for SOR-CORR and OER-CORR at the current density of 10, 20, 50 and 100 mA cm<sup>-2</sup>.

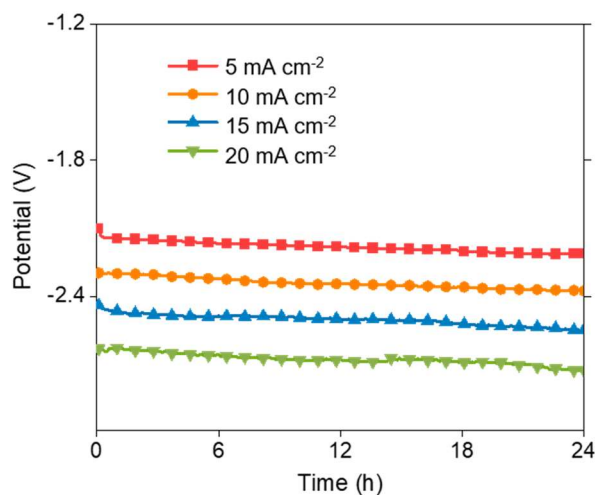

**Fig. S12** Galvanostatic test for the uncoupled device in the OER-CORR process at the current density from 5 to 20 mA cm<sup>-2</sup> in 24 hours.

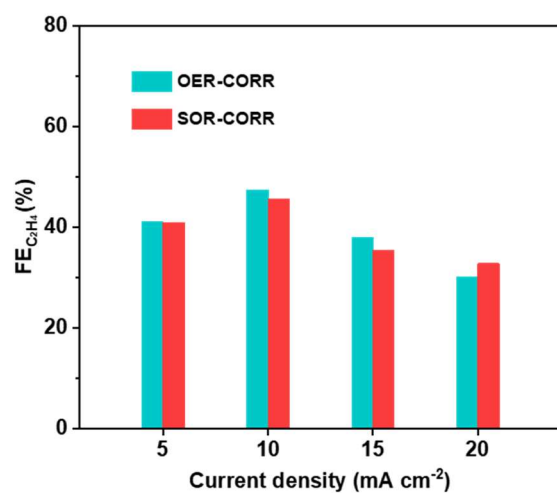

**Fig. S13** The comparison of FE for ethylene production in the SOR-CORR process and the OER-CORR process.

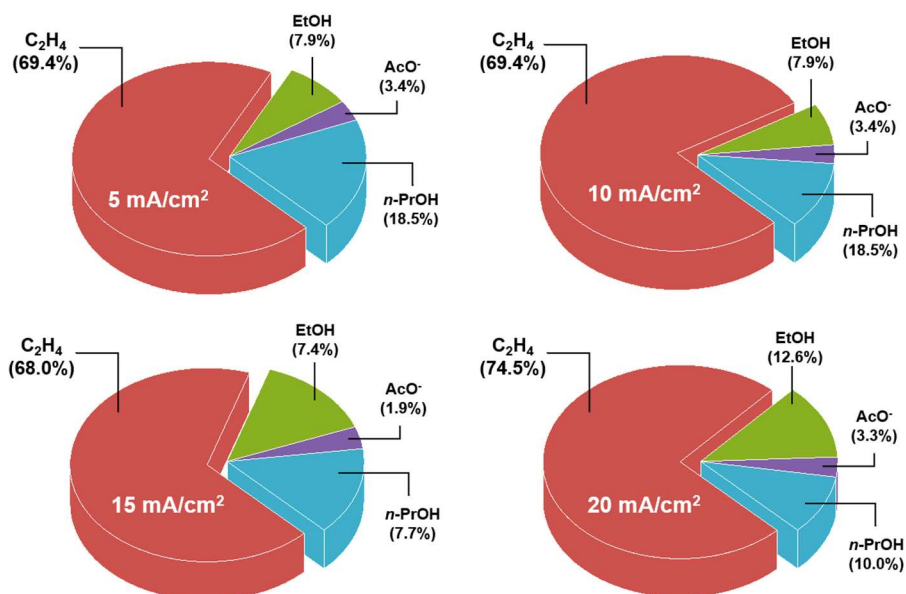

**Fig. S14** The selectivity of CORR at the current density from 5 to 20 mA cm<sup>-2</sup>.

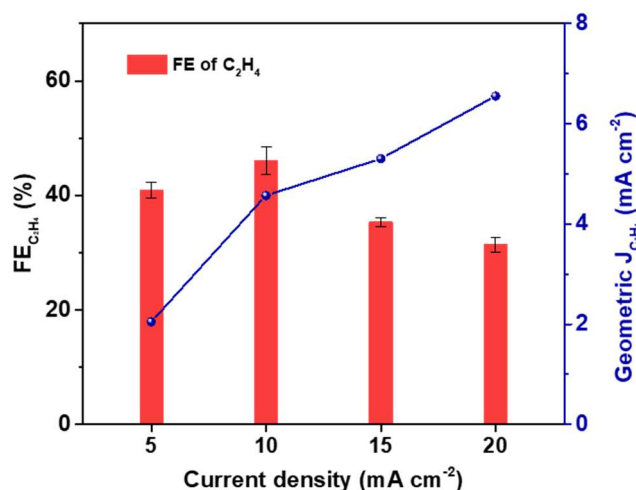

**Fig. S15** The geometric current density for CO electroreduction to C<sub>2</sub>H<sub>4</sub> production in the two-electrode SOR-CORR reaction.

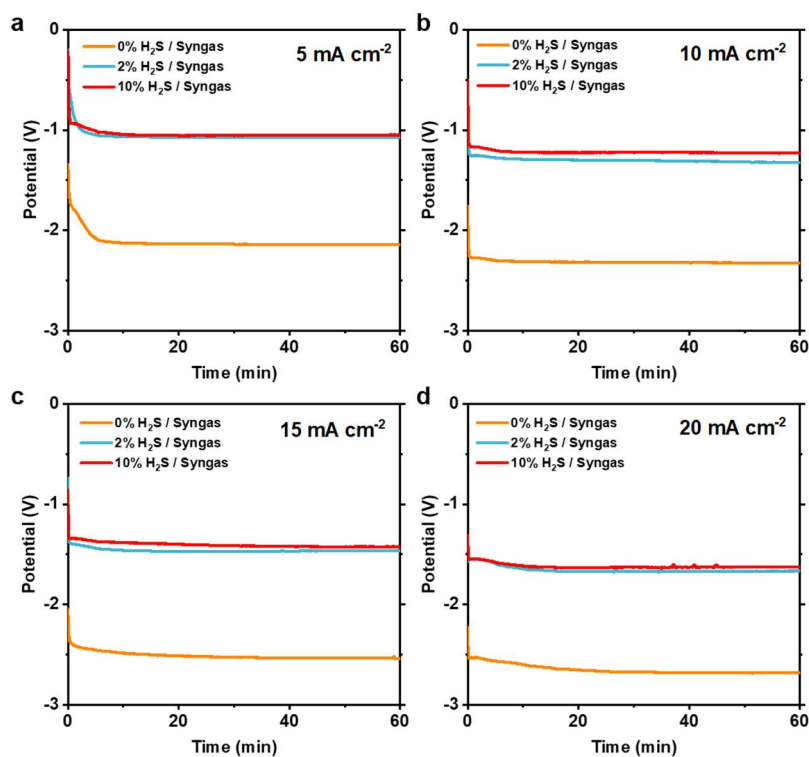

**Fig. S16** The potentials of the coupled device at different current densities when dealing with different syngas.

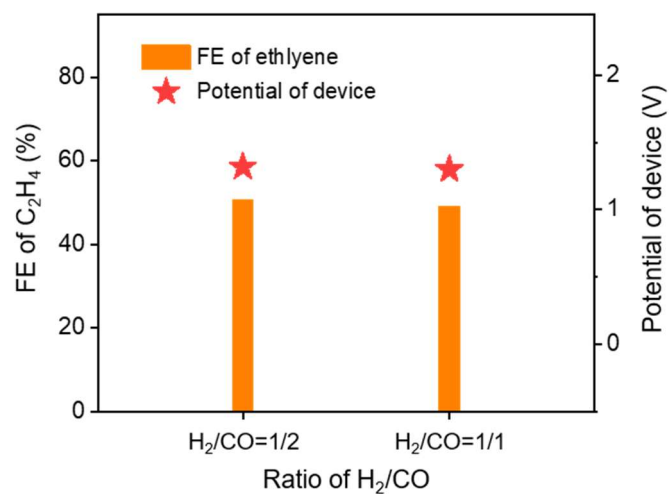

**Fig. S17** The effect of different ratio of H<sub>2</sub> to CO on the performance of direct electrolysis of crude syngas containing 2% H<sub>2</sub>S.

**Table S1.** The FE of CORR products at the cathode when dealing with 0% H<sub>2</sub>S-  
contained syngas with 1 M NaOH as electrolyte.

| Current<br>density<br>(mA cm <sup>-2</sup> ) | FE of products (%)            |      |                  |                | Selectivity<br>of ethylene<br>(%) |
|----------------------------------------------|-------------------------------|------|------------------|----------------|-----------------------------------|
|                                              | C <sub>2</sub> H <sub>4</sub> | EtOH | AcO <sup>-</sup> | <i>n</i> -PrOH |                                   |
| 5                                            | 41.6                          | 7.9  | 2.0              | 14.4           | 63.1                              |
| 10                                           | 50.2                          | 8.9  | 1.1              | 8.2            | 73.4                              |
| 15                                           | 39.0                          | 6.0  | 1.9              | 5.9            | 73.9                              |
| 20                                           | 25.9                          | 6.8  | 0.8              | 3.7            | 69.6                              |

**Table S2.** The FE of CORR products at the cathode when dealing with 2% H<sub>2</sub>S-  
contained syngas with 1 M NaOH as electrolyte.

| Current<br>density<br>(mA cm <sup>-2</sup> ) | FE of products (%)            |      |                  |                | Selectivity<br>of ethylene<br>(%) |
|----------------------------------------------|-------------------------------|------|------------------|----------------|-----------------------------------|
|                                              | C <sub>2</sub> H <sub>4</sub> | EtOH | AcO <sup>-</sup> | <i>n</i> -PrOH |                                   |
| 5                                            | 41.1                          | 3.7  | 1.7              | 13.4           | 68.6                              |
| 10                                           | 50.6                          | 6.8  | 1.1              | 7.0            | 77.3                              |
| 15                                           | 37.8                          | 8.2  | 2.1              | 6.2            | 69.6                              |
| 20                                           | 25.4                          | 6.7  | 1.0              | 6.6            | 64.0                              |

**Table S3.** The FE of CORR products at the cathode when dealing with 10% H<sub>2</sub>S-  
contained syngas with 1 M NaOH as electrolyte.

| Current<br>density<br>(mA cm <sup>-2</sup> ) | FE of products (%)            |      |                  |                | Selectivity<br>of ethylene<br>(%) |
|----------------------------------------------|-------------------------------|------|------------------|----------------|-----------------------------------|
|                                              | C <sub>2</sub> H <sub>4</sub> | EtOH | AcO <sup>-</sup> | <i>n</i> -PrOH |                                   |
| 5                                            | 40.6                          | 10.0 | 2.8              | 12.2           | 61.9                              |
| 10                                           | 49.7                          | 8.4  | 1.0              | 7.2            | 75.0                              |
| 15                                           | 38.5                          | 7.7  | 0.9              | 6.6            | 71.7                              |
| 20                                           | 25.7                          | 6.1  | 1.1              | 4.2            | 69.3                              |

## References

- 1 M. Zhang, J. Guan, Y. Tu, S. Chen, Y. Wang, S. Wang, L. Yu, C. Ma, D. Deng and X. Bao, *Energy Environ. Sci.*, 2020, **13**, 119-126.
- 2 R. Chen, H. Y. Su, D. Liu, R. Huang, X. Meng, X. Cui, Z. Q. Tian, D. H. Zhang and D. Deng, *Angew. Chem. Int. Ed.*, 2020, **59**, 154-160.
